# Supplementary material for: Threshold of carbonate saturation state determined by CO 2 control experiment
Source: Copernicus journal article supplement (doi:10.5194/bg-9-1441-2012), 2012-04-17
Supplement: Supplementary file 1 [file Supplementary-3.pdf › Supplementary-3.pdf]

Supplementary Material Table 1. Temperature, calculated salinity, total alkalinity ( $A_T$ ), total dissolved inorganic carbon ( $C_T$ ), and water volume: calculated fugacity of  $\text{CO}_2$  ( $f(\text{CO}_2)$ ) and aragonite saturation state ( $\Omega_a$ ) at experiment temperature, salinity,  $A_T$  and  $C_T$ ; and net dissolution rate between each experimental time interval.

| Sampling time(hh:mm)                                                             | Temperature (°C) | Salinity (Calculated) | $A_T$ ( $\mu\text{ mol kg}^{-1}$ ) | $nA_T$ ( $\mu\text{ mol kg}^{-1}$ ) | $C_T$ ( $\mu\text{ mol kg}^{-1}$ ) | $f(\text{CO}_2)$ ( $\mu\text{ atm}$ ) | $\Omega_a$ | Water Volume (kg) | Average Dissolution Rate (% day $^{-1}$ ) |
|----------------------------------------------------------------------------------|------------------|-----------------------|------------------------------------|-------------------------------------|------------------------------------|---------------------------------------|------------|-------------------|-------------------------------------------|
| <b>Bulk sediment Run#1</b> $\rho\text{CO}_2=2030\text{ppm}$ Sample weight:12.68g |                  |                       |                                    |                                     |                                    |                                       |            |                   |                                           |
| 0:00                                                                             | 26.6             | 34.55                 | 2460                               | 2459                                | 2387                               | 1703                                  | 1.36       | 3757              |                                           |
| 1:00                                                                             | 26.1             | 34.56                 | 2463                               | 2461                                | 2391                               | 1694                                  | 1.34       | 3600              |                                           |
| 1:15                                                                             | 26.0             | 34.57                 | 2467                               | 2465                                | 2409                               | 1856                                  | 1.24       | 3444              | 0.006                                     |
| 2:15                                                                             | 25.9             | 34.58                 | 2471                               | 2468                                | 2389                               | 1573                                  | 1.43       | 3288              |                                           |
| 2:30                                                                             | 25.9             | 34.58                 | 2469                               | 2465                                | 2406                               | 1792                                  | 1.28       | 3236              | 0.004                                     |
| 3:30                                                                             | 26.0             | 34.60                 | 2477                               | 2472                                | 2414                               | 1806                                  | 1.28       | 3080              |                                           |
| 3:45                                                                             | 26.0             | 34.60                 | 2474                               | 2469                                | 2417                               | 1878                                  | 1.24       | 3028              | 0.004                                     |
| 5:00                                                                             | 26.0             | 34.62                 | 2480                               | 2474                                | 2391                               | 1518                                  | 1.49       | 2871              |                                           |
| 5:15                                                                             | 26.0             | 34.62                 | 2482                               | 2475                                | 2398                               | 1579                                  | 1.44       | 2819              | 0.003                                     |
| 6:30                                                                             | 26.3             | 34.64                 | 2488                               | 2480                                | 2389                               | 1447                                  | 1.58       | 2663              |                                           |
| 6:45                                                                             | 26.3             | 34.64                 | 2489                               | 2480                                | 2406                               | 1612                                  | 1.44       | 2611              | 0.004                                     |
| <b>Bulk sediment Run#2</b> $\rho\text{CO}_2=1290\text{ppm}$ Sample weight:15.72g |                  |                       |                                    |                                     |                                    |                                       |            |                   |                                           |
| 0:00                                                                             | 28.8             | 34.44                 | 2386                               | 2392                                | 2268                               | 1318                                  | 1.73       | 4395              |                                           |
| 1:05                                                                             | 27.7             | 34.45                 | 2389                               | 2395                                | 2251                               | 1093                                  | 1.94       | 4239              |                                           |
| 1:20                                                                             | 27.4             | 34.45                 | 2388                               | 2394                                | 2250                               | 1080                                  | 1.93       | 4082              |                                           |
| 1:35                                                                             | 27.1             | 34.46                 | 2390                               | 2395                                | 2246                               | 1034                                  | 1.98       | 3926              | 0.004                                     |
| 2:50                                                                             | 26.6             | 34.48                 | 2395                               | 2398                                | 2243                               | 973                                   | 2.04       | 3770              |                                           |
| 3:05                                                                             | 26.5             | 34.49                 | 2395                               | 2398                                | 2245                               | 980                                   | 2.03       | 3614              | 0.003                                     |
| 4:20                                                                             | 26.5             | 34.51                 | 2400                               | 2401                                | 2247                               | 964                                   | 2.06       | 3457              |                                           |
| 4:35                                                                             | 26.5             | 34.52                 | 2399                               | 2400                                | 2246                               | 963                                   | 2.06       | 3301              |                                           |
| 4:50                                                                             | 26.4             | 34.52                 | 2400                               | 2401                                | 2249                               | 973                                   | 2.04       | 3145              |                                           |
| 5:05                                                                             | 26.4             | 34.53                 | 2399                               | 2399                                | 2260                               | 1046                                  | 1.92       | 2989              | 0.002                                     |
| 5:50                                                                             | 26.5             | 34.54                 | 2400                               | 2399                                | 2260                               | 1044                                  | 1.94       | 2832              |                                           |
| 6:05                                                                             | 26.5             | 34.55                 | 2401                               | 2400                                | 2259                               | 1026                                  | 1.96       | 2676              | -0.001                                    |
| <b>Bulk sediment Run#3</b> $\rho\text{CO}_2=1110\text{ppm}$ Sample weight:11.33g |                  |                       |                                    |                                     |                                    |                                       |            |                   |                                           |
| 0:00                                                                             | 27.8             | 34.45                 | 2400                               | 2405                                | 2226                               | 935                                   | 2.20       | 3294              |                                           |
| 1:30                                                                             | 26.8             | 34.49                 | 2407                               | 2410                                | 2250                               | 998                                   | 2.02       | 2981              |                                           |
| 1:45                                                                             | 26.7             | 34.50                 | 2405                               | 2407                                | 2249                               | 1004                                  | 2.00       | 2825              | 0.001                                     |
| 3:00                                                                             | 26.6             | 34.53                 | 2405                               | 2405                                | 2221                               | 845                                   | 2.28       | 2669              | -0.001                                    |
| 5:00                                                                             | 26.5             | 34.58                 | 2416                               | 2413                                | 2216                               | 777                                   | 2.44       | 2357              | 0.002                                     |
| 6:15                                                                             | 26.4             | 34.61                 | 2421                               | 2415                                | 2216                               | 758                                   | 2.48       | 2200              | 0.002                                     |
| <b>Bulk sediment Run#4</b> $\rho\text{CO}_2=820\text{ppm}$ Sample weight:14.11g  |                  |                       |                                    |                                     |                                    |                                       |            |                   |                                           |
| 0:00                                                                             | 27.8             | 34.55                 | 2374                               | 2372                                | 2146                               | 667                                   | 2.77       | 4098              |                                           |
| 2:30                                                                             | 26.8             | 34.55                 | 2377                               | 2375                                | 2154                               | 661                                   | 2.70       | 3786              |                                           |
| 2:45                                                                             | 26.8             | 34.55                 | 2381                               | 2379                                | 2158                               | 661                                   | 2.70       | 3630              | 0.001                                     |
| 3:45                                                                             | 26.7             | 34.56                 | 2379                               | 2377                                | 2165                               | 688                                   | 2.62       | 3473              |                                           |
| 4:00                                                                             | 26.7             | 34.56                 | 2377                               | 2375                                | 2162                               | 688                                   | 2.61       | 3317              | 0.003                                     |
| 7:05                                                                             | 26.5             | 34.56                 | 2389                               | 2386                                | 2183                               | 725                                   | 2.52       | 3161              |                                           |
| 7:20                                                                             | 26.4             | 34.56                 | 2387                               | 2385                                | 2185                               | 732                                   | 2.49       | 3005              |                                           |
| 7:35                                                                             | 26.2             | 34.56                 | 2388                               | 2385                                | 2185                               | 724                                   | 2.49       | 2900              | 0.003                                     |
| 9:00                                                                             | 26.0             | 34.57                 | 2392                               | 2389                                | 2186                               | 710                                   | 2.52       | 2744              |                                           |
| 9:15                                                                             | 26.0             | 34.57                 | 2393                               | 2390                                | 2184                               | 699                                   | 2.55       | 2588              |                                           |
| 9:30                                                                             | 25.8             | 34.57                 | 2395                               | 2393                                | 2192                               | 714                                   | 2.49       | 2432              |                                           |
| 9:45                                                                             | 25.5             | 34.57                 | 2398                               | 2395                                | 2186                               | 679                                   | 2.57       | 2275              | 0.003                                     |

Supplementary Material Table 1. (continued)

| Sampling<br>time(hh:mm)                                                         | Temperature<br>(°C) | Salinity<br>(Calculated) | $A_T$<br>( $\mu\text{ mol kg}^{-1}$ ) | $nA_T$<br>( $\mu\text{ mol kg}^{-1}$ ) | $C_T$<br>( $\mu\text{ mol kg}^{-1}$ ) | $f(\text{CO}_2)$<br>( $\mu\text{ atm}$ ) | $\Omega_a$ | Water<br>Volume (kg) | Average Dissolution<br>Rate (% day <sup>-1</sup> ) |
|---------------------------------------------------------------------------------|---------------------|--------------------------|---------------------------------------|----------------------------------------|---------------------------------------|------------------------------------------|------------|----------------------|----------------------------------------------------|
| <b>Bulk sediment Run#5</b> $\rho\text{CO}_2=750\text{ppm}$ Sample weight:10.65g |                     |                          |                                       |                                        |                                       |                                          |            |                      |                                                    |
| 0:00                                                                            | 29.4                | 34.44                    | 2372                                  | 2378                                   | 2160                                  | 767                                      | 2.64       | 3431                 |                                                    |
| 2:15                                                                            | 27.7                | 34.51                    | 2378                                  | 2379                                   | 2136                                  | 621                                      | 2.90       | 2764                 | 0.001                                              |
| 4:30                                                                            | 29.5                | 34.56                    | 2383                                  | 2381                                   | 2160                                  | 734                                      | 2.76       | 2296                 | 0.001                                              |
| 6:00                                                                            | 29.8                | 34.60                    | 2390                                  | 2384                                   | 2167                                  | 751                                      | 2.76       | 2140                 |                                                    |
| 6:30                                                                            | 30.0                | 34.61                    | 2392                                  | 2386                                   | 2168                                  | 751                                      | 2.78       | 1983                 | 0.003                                              |
| 7:00                                                                            | 30.2                | 34.63                    | 2394                                  | 2387                                   | 2163                                  | 733                                      | 2.85       | 1827                 |                                                    |
| 7:15                                                                            | 30.2                | 34.63                    | 2393                                  | 2386                                   | 2165                                  | 741                                      | 2.83       | 1671                 | 0.001                                              |
| <b>Bulk sediment Run#6</b> $\rho\text{CO}_2=590\text{ppm}$ Sample weight:13.23g |                     |                          |                                       |                                        |                                       |                                          |            |                      |                                                    |
| 0:00                                                                            | 26.8                | 34.47                    | 2400                                  | 2404                                   | 2104                                  | 466                                      | 3.47       | 3962                 |                                                    |
| 0:45                                                                            | 26.4                | 34.48                    | 2399                                  | 2402                                   | 2094                                  | 440                                      | 3.55       | 3806                 |                                                    |
| 1:00                                                                            | 26.4                | 34.48                    | 2400                                  | 2404                                   | 2088                                  | 427                                      | 3.62       | 3754                 | -0.002                                             |
| 1:45                                                                            | 26.3                | 34.48                    | 2400                                  | 2403                                   | 2070                                  | 389                                      | 3.83       | 3598                 |                                                    |
| 2:00                                                                            | 26.3                | 34.48                    | 2399                                  | 2403                                   | 2063                                  | 377                                      | 3.90       | 3545                 | -0.001                                             |
| 2:45                                                                            | 26.4                | 34.49                    | 2400                                  | 2403                                   | 2082                                  | 412                                      | 3.70       | 3389                 |                                                    |
| 3:00                                                                            | 26.4                | 34.49                    | 2400                                  | 2403                                   | 2083                                  | 415                                      | 3.68       | 3337                 | 0.000                                              |
| 3:55                                                                            | 26.4                | 34.49                    | 2404                                  | 2406                                   | 2089                                  | 422                                      | 3.66       | 3285                 |                                                    |
| 4:00                                                                            | 26.4                | 34.49                    | 2403                                  | 2405                                   | 2069                                  | 387                                      | 3.86       | 3129                 |                                                    |
| 4:15                                                                            | 26.5                | 34.49                    | 2405                                  | 2408                                   | 2076                                  | 397                                      | 3.81       | 2973                 |                                                    |
| 4:30                                                                            | 26.5                | 34.50                    | 2404                                  | 2406                                   | 2063                                  | 376                                      | 3.94       | 2816                 |                                                    |
| 4:45                                                                            | 26.5                | 34.50                    | 2406                                  | 2408                                   | 2070                                  | 386                                      | 3.88       | 2660                 |                                                    |
| 5:00                                                                            | 26.5                | 34.50                    | 2406                                  | 2408                                   | 2072                                  | 390                                      | 3.85       | 2577                 | 0.000                                              |
| 6:45                                                                            | 26.4                | 34.51                    | 2407                                  | 2409                                   | 2072                                  | 385                                      | 3.88       | 2420                 |                                                    |
| 7:00                                                                            | 26.4                | 34.51                    | 2407                                  | 2409                                   | 2075                                  | 391                                      | 3.84       | 2368                 | 0.001                                              |
| 7:45                                                                            | 26.3                | 34.51                    | 2408                                  | 2409                                   | 2076                                  | 390                                      | 3.84       | 2212                 |                                                    |
| 8:00                                                                            | 26.3                | 34.51                    | 2410                                  | 2411                                   | 2073                                  | 383                                      | 3.89       | 2160                 | 0.001                                              |
| <b>Bulk sediment Run#7</b> $\rho\text{CO}_2=420\text{ppm}$ Sample weight:10.25g |                     |                          |                                       |                                        |                                       |                                          |            |                      |                                                    |
| 0:00                                                                            | 26.4                | 34.50                    | 2394                                  | 2395                                   | 2095                                  | 452                                      | 3.48       | 2998                 |                                                    |
| 1:00                                                                            | 25.7                | 34.51                    | 2394                                  | 2395                                   | 2094                                  | 436                                      | 3.48       | 2842                 |                                                    |
| 1:15                                                                            | 25.7                | 34.51                    | 2393                                  | 2394                                   | 2082                                  | 415                                      | 3.59       | 2790                 | -0.001                                             |
| 3:32                                                                            | 25.7                | 34.52                    | 2390                                  | 2391                                   | 2084                                  | 423                                      | 3.54       | 2603                 |                                                    |
| 3:50                                                                            | 25.7                | 34.52                    | 2389                                  | 2389                                   | 2064                                  | 389                                      | 3.73       | 2446                 |                                                    |
| 4:05                                                                            | 25.8                | 34.52                    | 2390                                  | 2390                                   | 2072                                  | 402                                      | 3.66       | 2290                 |                                                    |
| 4:20                                                                            | 25.8                | 34.52                    | 2389                                  | 2390                                   | 2078                                  | 416                                      | 3.60       | 2134                 |                                                    |
| 4:35                                                                            | 25.8                | 34.52                    | 2391                                  | 2391                                   | 2083                                  | 423                                      | 3.55       | 1957                 | 0.000                                              |
| 6:24                                                                            | 25.8                | 34.53                    | 2392                                  | 2392                                   | 2081                                  | 416                                      | 3.59       | 1790                 |                                                    |
| 6:40                                                                            | 25.8                | 34.53                    | 2393                                  | 2393                                   | 2091                                  | 434                                      | 3.50       | 1634                 |                                                    |
| 6:55                                                                            | 25.8                | 34.53                    | 2393                                  | 2393                                   | 2076                                  | 405                                      | 3.66       | 1446                 |                                                    |
| 7:13                                                                            | 25.8                | 34.53                    | 2393                                  | 2393                                   | 2092                                  | 435                                      | 3.49       | 1290                 | 0.001                                              |

Supplementary Material Table 1. (continued)

| Sampling<br>time(hh:mm)                                                            | Temperature<br>(°C) | Salinity<br>(Calculated) | $A_T$<br>( $\mu\text{ mol kg}^{-1}$ ) | $nA_T$<br>( $\mu\text{ mol kg}^{-1}$ ) | $C_T$<br>( $\mu\text{ mol kg}^{-1}$ ) | $f(\text{CO}_2)$<br>( $\mu\text{ atm}$ ) | $\Omega_a$ | Water<br>Volume (kg) | Average Dissolution<br>Rate (% day <sup>-1</sup> ) |
|------------------------------------------------------------------------------------|---------------------|--------------------------|---------------------------------------|----------------------------------------|---------------------------------------|------------------------------------------|------------|----------------------|----------------------------------------------------|
| <b>Coralline algae Run#1</b> $\rho\text{CO}_2=2000\text{ppm}$ Sample weight:12.55g |                     |                          |                                       |                                        |                                       |                                          |            |                      |                                                    |
| 0:00                                                                               | 26.3                | 34.31                    | 2412                                  | 2427                                   | 2375                                  | 2115                                     | 1.07       | 3721                 |                                                    |
| 1:00                                                                               | 26.0                | 34.32                    | 2423                                  | 2437                                   | 2393                                  | 2206                                     | 1.03       | 3564                 |                                                    |
| 1:15                                                                               | 26.0                | 34.32                    | 2423                                  | 2437                                   | 2394                                  | 2227                                     | 1.02       | 3512                 | 0.019                                              |
| 2:00                                                                               | 26.1                | 34.34                    | 2429                                  | 2442                                   | 2379                                  | 1932                                     | 1.17       | 3356                 |                                                    |
| 2:15                                                                               | 26.1                | 34.34                    | 2430                                  | 2444                                   | 2404                                  | 2287                                     | 1.01       | 3304                 |                                                    |
| 2:20                                                                               | 26.1                | 34.34                    | 2428                                  | 2442                                   | 2407                                  | 2361                                     | 0.98       | 3200                 | 0.007                                              |
| 3:45                                                                               | 26.2                | 34.36                    | 2448                                  | 2460                                   | 2414                                  | 2191                                     | 1.07       | 3044                 |                                                    |
| 4:00                                                                               | 26.2                | 34.36                    | 2448                                  | 2460                                   | 2415                                  | 2203                                     | 1.06       | 2992                 | 0.013                                              |
| 5:00                                                                               | 26.2                | 34.37                    | 2457                                  | 2468                                   | 2424                                  | 2207                                     | 1.07       | 2835                 |                                                    |
| 5:15                                                                               | 26.2                | 34.37                    | 2457                                  | 2468                                   | 2420                                  | 2155                                     | 1.09       | 2783                 | 0.008                                              |
| 6:30                                                                               | 26.2                | 34.39                    | 2471                                  | 2481                                   | 2434                                  | 2159                                     | 1.10       | 2627                 |                                                    |
| 6:45                                                                               | 26.2                | 34.39                    | 2472                                  | 2481                                   | 2434                                  | 2159                                     | 1.10       | 2575                 | 0.009                                              |
| 8:00                                                                               | 26.3                | 34.41                    | 2487                                  | 2496                                   | 2447                                  | 2129                                     | 1.13       | 2419                 |                                                    |
| 8:15                                                                               | 26.3                | 34.41                    | 2487                                  | 2495                                   | 2447                                  | 2145                                     | 1.12       | 2367                 | 0.010                                              |
| 9:00                                                                               | 26.3                | 34.42                    | 2498                                  | 2505                                   | 2454                                  | 2102                                     | 1.15       | 2210                 |                                                    |
| 9:15                                                                               | 26.3                | 34.43                    | 2499                                  | 2507                                   | 2457                                  | 2124                                     | 1.14       | 2158                 | 0.009                                              |
| <b>Coralline algae Run#2</b> $\rho\text{CO}_2=1070\text{ppm}$ Sample weight:12.33g |                     |                          |                                       |                                        |                                       |                                          |            |                      |                                                    |
| 0:00                                                                               | 26.6                | 33.98                    | 2331                                  | 2368                                   | 2192                                  | 1014                                     | 1.87       | 3651                 |                                                    |
| 2:05                                                                               | 26.0                | 34.03                    | 2341                                  | 2375                                   | 2228                                  | 1182                                     | 1.63       | 3286                 |                                                    |
| 2:20                                                                               | 26.0                | 34.03                    | 2341                                  | 2375                                   | 2211                                  | 1058                                     | 1.78       | 3234                 | 0.004                                              |
| 3:18                                                                               | 26.0                | 34.06                    | 2345                                  | 2378                                   | 2234                                  | 1196                                     | 1.62       | 3114                 |                                                    |
| 3:30                                                                               | 26.0                | 34.06                    | 2346                                  | 2379                                   | 2234                                  | 1194                                     | 1.63       | 3052                 | 0.003                                              |
| 4:05                                                                               | 26.0                | 34.07                    | 2351                                  | 2382                                   | 2221                                  | 1067                                     | 1.79       | 2896                 |                                                    |
| 4:20                                                                               | 26.0                | 34.08                    | 2352                                  | 2383                                   | 2235                                  | 1159                                     | 1.67       | 2843                 | 0.007                                              |
| 5:35                                                                               | 26.0                | 34.11                    | 2359                                  | 2388                                   | 2242                                  | 1164                                     | 1.68       | 2687                 |                                                    |
| 5:50                                                                               | 26.0                | 34.11                    | 2359                                  | 2388                                   | 2240                                  | 1155                                     | 1.69       | 2635                 | 0.004                                              |
| 6:35                                                                               | 25.9                | 34.13                    | 2363                                  | 2391                                   | 2245                                  | 1154                                     | 1.69       | 2479                 |                                                    |
| 6:50                                                                               | 25.9                | 34.13                    | 2364                                  | 2392                                   | 2248                                  | 1168                                     | 1.67       | 2427                 | 0.003                                              |
| 7:45                                                                               | 26.0                | 34.16                    | 2371                                  | 2397                                   | 2249                                  | 1133                                     | 1.73       | 2271                 |                                                    |
| 8:00                                                                               | 26.0                | 34.16                    | 2373                                  | 2398                                   | 2253                                  | 1158                                     | 1.70       | 2218                 | 0.005                                              |
| <b>Coralline algae Run#3</b> $\rho\text{CO}_2=830\text{ppm}$ Sample weight:10.86g  |                     |                          |                                       |                                        |                                       |                                          |            |                      |                                                    |
| 0:00                                                                               | 26.5                | 34.51                    | 2394                                  | 2395                                   | 2222                                  | 877                                      | 2.20       | 3242                 |                                                    |
| 1:40                                                                               | 26.0                | 34.52                    | 2397                                  | 2398                                   | 2181                                  | 671                                      | 2.63       | 3086                 |                                                    |
| 1:55                                                                               | 25.9                | 34.52                    | 2398                                  | 2399                                   | 2172                                  | 639                                      | 2.72       | 3033                 | 0.006                                              |
| 3:57                                                                               | 25.6                | 34.52                    | 2403                                  | 2404                                   | 2179                                  | 637                                      | 2.71       | 2846                 |                                                    |
| 4:15                                                                               | 25.6                | 34.52                    | 2405                                  | 2406                                   | 2170                                  | 604                                      | 2.82       | 2794                 | 0.004                                              |
| 5:06                                                                               | 25.5                | 34.53                    | 2406                                  | 2407                                   | 2190                                  | 665                                      | 2.62       | 2648                 |                                                    |
| 5:20                                                                               | 25.5                | 34.53                    | 2407                                  | 2407                                   | 2192                                  | 669                                      | 2.62       | 2492                 | 0.002                                              |
| 5:35                                                                               | 25.6                | 34.53                    | 2410                                  | 2410                                   | 2187                                  | 645                                      | 2.70       | 2336                 |                                                    |
| 5:50                                                                               | 25.6                | 34.53                    | 2413                                  | 2413                                   | 2202                                  | 691                                      | 2.57       | 2185                 | 0.010                                              |
| <b>Coralline algae Run#4</b> $\rho\text{CO}_2=570\text{ppm}$ Sample weight:12.55g  |                     |                          |                                       |                                        |                                       |                                          |            |                      |                                                    |
| 0:00                                                                               | 26.2                | 34.33                    | 2369                                  | 2382                                   | 2107                                  | 522                                      | 3.08       | 2677                 |                                                    |
| 1:00                                                                               | 26.2                | 34.34                    | 2371                                  | 2384                                   | 2131                                  | 585                                      | 2.86       | 2521                 | 0.000                                              |
| 1:15                                                                               | 26.2                | 34.34                    | 2369                                  | 2382                                   | 2129                                  | 584                                      | 2.86       | 2469                 |                                                    |
| 2:45                                                                               | 26.2                | 34.34                    | 2375                                  | 2388                                   | 2133                                  | 578                                      | 2.89       | 2313                 | 0.003                                              |
| 3:00                                                                               | 26.2                | 34.34                    | 2375                                  | 2387                                   | 2132                                  | 577                                      | 2.89       | 2261                 |                                                    |
| 4:15                                                                               | 26.3                | 34.35                    | 2376                                  | 2389                                   | 2138                                  | 594                                      | 2.85       | 2105                 | 0.001                                              |
| 4:30                                                                               | 26.3                | 34.35                    | 2377                                  | 2390                                   | 2137                                  | 588                                      | 2.87       | 2053                 |                                                    |
| 5:45                                                                               | 26.3                | 34.35                    | 2379                                  | 2392                                   | 2137                                  | 583                                      | 2.90       | 1896                 | 0.001                                              |
| 6:00                                                                               | 26.3                | 34.35                    | 2380                                  | 2392                                   | 2139                                  | 588                                      | 2.88       | 1844                 |                                                    |
| 7:00                                                                               | 26.3                | 34.36                    | 2382                                  | 2394                                   | 2143                                  | 594                                      | 2.86       | 1688                 | 0.001                                              |

Supplementary Material Table 1. (continued)

| Sampling<br>time(hh:mm)                                                         | Temperature<br>(°C) | Salinity<br>(Calculated) | $A_T$<br>( $\mu\text{ mol kg}^{-1}$ ) | $nA_T$<br>( $\mu\text{ mol kg}^{-1}$ ) | $C_T$<br>( $\mu\text{ mol kg}^{-1}$ ) | $f(\text{CO}_2)$<br>( $\mu\text{ atm}$ ) | $\Omega_a$ | Water<br>Volume (kg) | Average Dissolution<br>Rate (% day <sup>-1</sup> ) |
|---------------------------------------------------------------------------------|---------------------|--------------------------|---------------------------------------|----------------------------------------|---------------------------------------|------------------------------------------|------------|----------------------|----------------------------------------------------|
| <b>Foraminifera Run#1</b> $\rho\text{CO}_2=2210\text{ppm}$ Sample weight:11.64g |                     |                          |                                       |                                        |                                       |                                          |            |                      |                                                    |
| 0:00                                                                            | 29.2                | 34.52                    | 2424                                  | 2425                                   | 2375                                  | 2109                                     | 1.23       | 3482                 |                                                    |
| 1:15                                                                            | 26.6                | 34.54                    | 2432                                  | 2431                                   | 2393                                  | 2127                                     | 1.10       | 3326                 |                                                    |
| 1:30                                                                            | 26.6                | 34.54                    | 2434                                  | 2433                                   | 2400                                  | 2208                                     | 1.07       | 3269                 | 0.013                                              |
| 2:15                                                                            | 26.4                | 34.55                    | 2438                                  | 2436                                   | 2388                                  | 1968                                     | 1.17       | 3112                 |                                                    |
| 2:30                                                                            | 26.3                | 34.56                    | 2438                                  | 2436                                   | 2413                                  | 2337                                     | 1.01       | 3029                 | 0.005                                              |
| 3:55                                                                            | 26.3                | 34.58                    | 2446                                  | 2443                                   | 2417                                  | 2270                                     | 1.04       | 2873                 |                                                    |
| 4:10                                                                            | 26.3                | 34.58                    | 2447                                  | 2443                                   | 2419                                  | 2299                                     | 1.03       | 2821                 | 0.005                                              |
| 6:15                                                                            | 26.3                | 34.61                    | 2459                                  | 2453                                   | 2428                                  | 2247                                     | 1.06       | 2665                 |                                                    |
| 6:30                                                                            | 26.3                | 34.61                    | 2458                                  | 2452                                   | 2429                                  | 2292                                     | 1.04       | 2613                 | 0.005                                              |
| 7:20                                                                            | 26.3                | 34.63                    | 2464                                  | 2457                                   | 2434                                  | 2268                                     | 1.05       | 2508                 |                                                    |
| 7:35                                                                            | 26.3                | 34.63                    | 2463                                  | 2456                                   | 2437                                  | 2342                                     | 1.02       | 2456                 | 0.004                                              |
| 8:10                                                                            | 26.3                | 34.64                    | 2463                                  | 2455                                   | 2441                                  | 2414                                     | 1.00       | 2352                 |                                                    |
| 8:25                                                                            | 26.3                | 34.64                    | 2468                                  | 2460                                   | 2442                                  | 2342                                     | 1.03       | 2300                 |                                                    |
| 8:30                                                                            | 26.3                | 34.65                    | 2465                                  | 2457                                   | 2442                                  | 2380                                     | 1.01       | 2144                 | 0.001                                              |
| <b>Foraminifera Run#2</b> $\rho\text{CO}_2=1240\text{ppm}$ Sample weight:10.23g |                     |                          |                                       |                                        |                                       |                                          |            |                      |                                                    |
| 0:00                                                                            | 27.5                | 34.51                    | 2436                                  | 2437                                   | 2262                                  | 925                                      | 2.26       | 2889                 |                                                    |
| 0:45                                                                            | 26.6                | 34.53                    | 2437                                  | 2437                                   | 2273                                  | 947                                      | 2.15       | 2733                 |                                                    |
| 1:00                                                                            | 26.6                | 34.53                    | 2438                                  | 2438                                   | 2281                                  | 988                                      | 2.08       | 2681                 | 0.001                                              |
| 2:00                                                                            | 26.2                | 34.55                    | 2442                                  | 2440                                   | 2285                                  | 977                                      | 2.08       | 2524                 |                                                    |
| 2:15                                                                            | 26.2                | 34.55                    | 2442                                  | 2440                                   | 2287                                  | 993                                      | 2.05       | 2472                 | 0.003                                              |
| 3:30                                                                            | 26.2                | 34.58                    | 2447                                  | 2443                                   | 2288                                  | 970                                      | 2.10       | 2316                 |                                                    |
| 3:45                                                                            | 26.2                | 34.59                    | 2447                                  | 2443                                   | 2291                                  | 986                                      | 2.07       | 2264                 | 0.002                                              |
| 4:30                                                                            | 26.1                | 34.60                    | 2449                                  | 2444                                   | 2289                                  | 958                                      | 2.11       | 2108                 |                                                    |
| 4:45                                                                            | 26.1                | 34.61                    | 2450                                  | 2444                                   | 2289                                  | 959                                      | 2.11       | 2056                 | 0.001                                              |
| 5:30                                                                            | 26.1                | 34.63                    | 2455                                  | 2448                                   | 2278                                  | 878                                      | 2.27       | 1899                 |                                                    |
| 5:45                                                                            | 26.1                | 34.63                    | 2454                                  | 2447                                   | 2278                                  | 880                                      | 1.85       | 1847                 | 0.003                                              |
| <b>Foraminifera Run#3</b> $\rho\text{CO}_2=570\text{ppm}$ Sample weight:11.49g  |                     |                          |                                       |                                        |                                       |                                          |            |                      |                                                    |
| 0:00                                                                            | 26.4                | 34.08                    | 2326                                  | 2356                                   | 2086                                  | 563                                      | 2.86       | 3387                 |                                                    |
| 0:45                                                                            | 26.0                | 34.08                    | 2326                                  | 2356                                   | 2083                                  | 546                                      | 2.88       | 3231                 |                                                    |
| 1:00                                                                            | 26.1                | 34.08                    | 2325                                  | 2355                                   | 2081                                  | 546                                      | 2.88       | 3179                 | -0.001                                             |
| 3:00                                                                            | 26.3                | 34.09                    | 2325                                  | 2354                                   | 2081                                  | 552                                      | 2.88       | 3022                 |                                                    |
| 3:15                                                                            | 26.3                | 34.09                    | 2325                                  | 2355                                   | 2073                                  | 528                                      | 2.97       | 2970                 | -0.001                                             |
| 4:15                                                                            | 26.3                | 34.09                    | 2332                                  | 2362                                   | 2069                                  | 500                                      | 3.10       | 2866                 |                                                    |
| 4:30                                                                            | 26.3                | 34.10                    | 2331                                  | 2361                                   | 2075                                  | 520                                      | 3.01       | 2731                 | 0.006                                              |
| 6:15                                                                            | 26.3                | 34.10                    | 2334                                  | 2364                                   | 2094                                  | 566                                      | 2.85       | 2575                 |                                                    |
| 6:30                                                                            | 26.3                | 34.10                    | 2334                                  | 2363                                   | 2096                                  | 570                                      | 2.84       | 2522                 | 0.001                                              |
| 7:45                                                                            | 26.4                | 34.11                    | 2337                                  | 2366                                   | 2099                                  | 575                                      | 2.84       | 2366                 |                                                    |
| 8:00                                                                            | 26.5                | 34.11                    | 2336                                  | 2365                                   | 2102                                  | 587                                      | 2.80       | 2210                 |                                                    |
| 8:15                                                                            | 26.5                | 34.11                    | 2336                                  | 2365                                   | 2098                                  | 576                                      | 2.84       | 2054                 | 0.001                                              |
| 9:30                                                                            | 26.5                | 34.11                    | 2341                                  | 2370                                   | 2109                                  | 597                                      | 2.78       | 1897                 |                                                    |
| 9:45                                                                            | 26.5                | 34.11                    | 2342                                  | 2371                                   | 2106                                  | 585                                      | 2.83       | 1845                 | 0.003                                              |
| <b>Foraminifera Run#4</b> $\rho\text{CO}_2=510\text{ppm}$ Sample weight:12.47g  |                     |                          |                                       |                                        |                                       |                                          |            |                      |                                                    |
| 0:00                                                                            | 26.5                | 34.37                    | 2403                                  | 2414                                   | 2135                                  | 527                                      | 3.18       | 3694                 |                                                    |
| 1:00                                                                            | 26.2                | 34.37                    | 2399                                  | 2409                                   | 2136                                  | 532                                      | 3.11       | 3537                 |                                                    |
| 1:15                                                                            | 26.1                | 34.38                    | 2398                                  | 2409                                   | 2133                                  | 524                                      | 3.14       | 3485                 | -0.008                                             |
| 2:00                                                                            | 26.0                | 34.38                    | 2401                                  | 2411                                   | 2139                                  | 533                                      | 3.09       | 3329                 |                                                    |
| 2:15                                                                            | 26.0                | 34.38                    | 2402                                  | 2412                                   | 2125                                  | 496                                      | 3.25       | 3277                 | -0.001                                             |
| 4:10                                                                            | 26.0                | 34.38                    | 2400                                  | 2410                                   | 2138                                  | 530                                      | 3.11       | 3121                 |                                                    |
| 4:25                                                                            | 26.0                | 34.38                    | 2402                                  | 2412                                   | 2137                                  | 525                                      | 3.13       | 3069                 | 0.000                                              |
| 5:10                                                                            | 26.0                | 34.39                    | 2401                                  | 2411                                   | 2129                                  | 507                                      | 3.20       | 2912                 |                                                    |
| 5:25                                                                            | 26.0                | 34.39                    | 2399                                  | 2409                                   | 2127                                  | 506                                      | 3.20       | 2853                 | -0.002                                             |
| 6:45                                                                            | 26.1                | 34.39                    | 2406                                  | 2415                                   | 2133                                  | 509                                      | 3.21       | 2697                 |                                                    |
| 7:00                                                                            | 26.1                | 34.39                    | 2403                                  | 2412                                   | 2121                                  | 484                                      | 3.31       | 2645                 | 0.003                                              |
| 9:00                                                                            | 26.3                | 34.40                    | 2402                                  | 2411                                   | 2125                                  | 499                                      | 3.26       | 2333                 |                                                    |
| 9:15                                                                            | 26.3                | 34.40                    | 2402                                  | 2411                                   | 2123                                  | 494                                      | 3.29       | 2281                 | -0.001                                             |

Supplementary Material Table 1. (continued)

| Sampling<br>time(hh:mm)                                                  | Temperature<br>(°C) | Salinity<br>(Calculated) | $A_T$<br>( $\mu\text{ mol kg}^{-1}$ ) | $nA_T$<br>( $\mu\text{ mol kg}^{-1}$ ) | $C_T$<br>( $\mu\text{ mol kg}^{-1}$ ) | $f(\text{CO}_2)$<br>( $\mu\text{ atm}$ ) | $\Omega_a$ | Water<br>Volume (kg) | Average Dissolution<br>Rate (% day <sup>-1</sup> ) |
|--------------------------------------------------------------------------|---------------------|--------------------------|---------------------------------------|----------------------------------------|---------------------------------------|------------------------------------------|------------|----------------------|----------------------------------------------------|
| <b>Coral Run#1</b> $\rho\text{CO}_2=2100\text{ppm}$ Sample weight:12.94g |                     |                          |                                       |                                        |                                       |                                          |            |                      |                                                    |
| 0:00                                                                     | 26.3                | 34.50                    | 2436                                  | 2437                                   | 2390                                  | 2017                                     | 1.14       | 3684                 |                                                    |
| 1:00                                                                     | 26.0                | 34.51                    | 2435                                  | 2436                                   | 2412                                  | 2302                                     | 1.00       | 3528                 |                                                    |
| 1:15                                                                     | 25.9                | 34.51                    | 2437                                  | 2438                                   | 2392                                  | 1977                                     | 1.14       | 3476                 | 0.000                                              |
| 2:10                                                                     | 25.7                | 34.52                    | 2442                                  | 2442                                   | 2412                                  | 2207                                     | 1.03       | 3320                 |                                                    |
| 2:25                                                                     | 25.7                | 34.53                    | 2442                                  | 2442                                   | 2397                                  | 1980                                     | 1.14       | 3268                 | 0.005                                              |
| 3:30                                                                     | 25.5                | 34.54                    | 2442                                  | 2441                                   | 2418                                  | 2252                                     | 1.01       | 3111                 |                                                    |
| 3:45                                                                     | 25.5                | 34.54                    | 2442                                  | 2441                                   | 2421                                  | 2293                                     | 0.99       | 3059                 | -0.001                                             |
| 4:30                                                                     | 25.4                | 34.55                    | 2447                                  | 2446                                   | 2396                                  | 1871                                     | 1.18       | 2903                 |                                                    |
| 4:45                                                                     | 25.3                | 34.55                    | 2448                                  | 2447                                   | 2425                                  | 2261                                     | 1.00       | 2747                 |                                                    |
| 5:00                                                                     | 25.3                | 34.55                    | 2447                                  | 2446                                   | 2428                                  | 2308                                     | 0.98       | 2590                 |                                                    |
| 5:15                                                                     | 25.2                | 34.55                    | 2450                                  | 2448                                   | 2425                                  | 2220                                     | 1.02       | 2434                 | 0.004                                              |
| 6:30                                                                     | 25.2                | 34.57                    | 2454                                  | 2452                                   | 2433                                  | 2265                                     | 1.00       | 2278                 |                                                    |
| 6:45                                                                     | 25.2                | 34.57                    | 2455                                  | 2452                                   | 2421                                  | 2071                                     | 1.09       | 2226                 | 0.003                                              |
| <b>Coral Run#2</b> $\rho\text{CO}_2=1550\text{ppm}$ Sample weight:12.72g |                     |                          |                                       |                                        |                                       |                                          |            |                      |                                                    |
| 0:00                                                                     | 26.5                | 34.84                    | 2579                                  | 2556                                   | 2473                                  | 1470                                     | 1.68       | 3773                 |                                                    |
| 1:00                                                                     | 25.9                | 34.85                    | 2582                                  | 2558                                   | 2461                                  | 1311                                     | 1.80       | 3617                 |                                                    |
| 1:15                                                                     | 25.8                | 34.85                    | 2581                                  | 2557                                   | 2486                                  | 1549                                     | 1.57       | 3565                 | 0.004                                              |
| 2:30                                                                     | 25.7                | 34.86                    | 2582                                  | 2557                                   | 2482                                  | 1483                                     | 1.62       | 3408                 |                                                    |
| 2:45                                                                     | 25.7                | 34.86                    | 2583                                  | 2558                                   | 2493                                  | 1589                                     | 1.53       | 3356                 | 0.000                                              |
| 4:10                                                                     | 25.6                | 34.87                    | 2583                                  | 2557                                   | 2495                                  | 1604                                     | 1.51       | 3200                 |                                                    |
| 4:25                                                                     | 25.6                | 34.88                    | 2583                                  | 2557                                   | 2485                                  | 1499                                     | 1.59       | 3148                 | 0.000                                              |
| 5:40                                                                     | 25.5                | 34.89                    | 2585                                  | 2558                                   | 2487                                  | 1506                                     | 1.59       | 2992                 |                                                    |
| 5:55                                                                     | 25.5                | 34.89                    | 2587                                  | 2560                                   | 2491                                  | 1519                                     | 1.59       | 2940                 | 0.002                                              |
| 7:00                                                                     | 25.6                | 34.90                    | 2583                                  | 2556                                   | 2488                                  | 1526                                     | 1.58       | 2783                 |                                                    |
| 7:15                                                                     | 25.6                | 34.90                    | 2582                                  | 2555                                   | 2498                                  | 1645                                     | 1.48       | 2731                 | -0.003                                             |
| 9:10                                                                     | 25.6                | 34.91                    | 2585                                  | 2557                                   | 2487                                  | 1503                                     | 1.60       | 2523                 |                                                    |
| 9:30                                                                     | 25.6                | 34.91                    | 2586                                  | 2558                                   | 2488                                  | 1507                                     | 1.60       | 2367                 |                                                    |
| 9:45                                                                     | 25.6                | 34.92                    | 2586                                  | 2558                                   | 2504                                  | 1662                                     | 1.47       | 2210                 | 0.001                                              |
| <b>Coral Run#3</b> $\rho\text{CO}_2=1070\text{ppm}$ Sample weight:12.97g |                     |                          |                                       |                                        |                                       |                                          |            |                      |                                                    |
| 0:00                                                                     | 26.4                | 34.41                    | 2411                                  | 2419                                   | 2233                                  | 853                                      | 2.26       | 3852                 |                                                    |
| 0:50                                                                     | 26.0                | 34.44                    | 2409                                  | 2416                                   | 2250                                  | 930                                      | 2.08       | 3652                 |                                                    |
| 1:05                                                                     | 25.9                | 34.44                    | 2412                                  | 2419                                   | 2249                                  | 908                                      | 2.12       | 3600                 | -0.002                                             |
| 3:50                                                                     | 26.0                | 34.50                    | 2418                                  | 2420                                   | 2263                                  | 967                                      | 2.04       | 3076                 |                                                    |
| 4:05                                                                     | 26.0                | 34.51                    | 2419                                  | 2421                                   | 2265                                  | 969                                      | 2.04       | 3024                 | 0.001                                              |
| 5:20                                                                     | 26.1                | 34.54                    | 2421                                  | 2420                                   | 2264                                  | 959                                      | 2.06       | 2868                 |                                                    |
| 5:35                                                                     | 26.1                | 34.54                    | 2420                                  | 2419                                   | 2266                                  | 974                                      | 2.04       | 2816                 | 0.000                                              |
| 6:20                                                                     | 26.0                | 34.56                    | 2423                                  | 2421                                   | 2265                                  | 952                                      | 2.07       | 2659                 |                                                    |
| 6:35                                                                     | 26.0                | 34.56                    | 2424                                  | 2422                                   | 2266                                  | 952                                      | 2.07       | 2607                 | 0.002                                              |
| 7:20                                                                     | 26.0                | 34.58                    | 2425                                  | 2421                                   | 2268                                  | 961                                      | 2.06       | 2453                 |                                                    |
| 7:35                                                                     | 26.0                | 34.58                    | 2426                                  | 2422                                   | 2268                                  | 953                                      | 2.08       | 2401                 | 0.000                                              |
